# Supplementary material for: Development of National Newborn Screening Quality Indicators in the United States
Source: MDPI journal article supplement (doi:10.3390/ijns5030034), 2019-09-12
Supplement: s1 [file s1]

**Supplementary Materials**

**Participants in the June 2011 Subject Matter Experts Meeting**

Additional information includes state or organization represented by each participant, number of newborn screens performed in each represented state, number of annual births in each represented state, and number of core conditions screened in each representative state at the time of the meeting.

| <b>Newborn Screening Subject Matter Experts Meeting on QIs</b> |                                                     |                                 |                                                            |                                       |
|----------------------------------------------------------------|-----------------------------------------------------|---------------------------------|------------------------------------------------------------|---------------------------------------|
| <b>June 14-15, 2011</b>                                        |                                                     |                                 |                                                            |                                       |
| <b>Attendee Name</b>                                           | <b>State/Affiliation</b>                            | <b>Annual Births (2010) [1]</b> | <b>Number of Core RUSP Conditions Screened in 2011 [2]</b> | <b>One Screen or Two Screen State</b> |
| Cheryl Hermerath                                               | Oregon                                              | 45,904                          | 28                                                         | Two                                   |
| Karim George                                                   | Kentucky                                            | 53,565                          | 28                                                         | One                                   |
| Scott Shone                                                    | New Jersey                                          | 103,932                         | 28                                                         | One                                   |
| Patrick Hopkins                                                | Missouri                                            | 77,588                          | 28                                                         | One                                   |
| Mark McCann                                                    | Minnesota                                           | 68,269                          | 28                                                         | One                                   |
| Roger Eaton                                                    | Massachusetts                                       | 73,275                          | 29                                                         | One                                   |
| Michael Glass                                                  | Washington                                          | 86,507                          | 28                                                         | Two                                   |
| Michele Caggana                                                | New York                                            | 246,081                         | 29                                                         | One                                   |
| Ward B. Jacox                                                  | Arizona                                             | 88,090                          | 29                                                         | Two                                   |
| Bob Bowman                                                     | Indiana                                             | 84,794                          | 28                                                         | One                                   |
| Bill Young                                                     | Michigan                                            | 113,509                         | 29                                                         | One                                   |
| Deborah Rodriguez                                              | New York                                            | 246,081                         | 29                                                         | One                                   |
| Sharon Vaz                                                     | Oklahoma                                            | 52,347                          | 27                                                         | One                                   |
| Sheila Weiss                                                   | Washington                                          | 86,507                          | 28                                                         | Two                                   |
| Leslie Gafney                                                  | California                                          | 510,980                         | 29                                                         | One                                   |
| Christelle Larose                                              | Rhode Island                                        | 11,843                          | 28                                                         | One                                   |
| Lou Bartoshesky                                                | Delaware                                            | 11,682                          | 28                                                         | Two                                   |
| Judi Tuerck                                                    | Oregon                                              | 45,904                          | 28                                                         | Two                                   |
| Donna Williams                                                 | Texas                                               | 392,764                         | 28                                                         | Two                                   |
| Jane Getchell                                                  | Delaware                                            | 11,682                          | 28                                                         | Two                                   |
| <b>National Partners</b>                                       |                                                     |                                 |                                                            |                                       |
| Sharon Terry                                                   | Genetic Alliance                                    |                                 |                                                            |                                       |
| Natasha Bonhomme                                               | Genetic Alliance                                    |                                 |                                                            |                                       |
| Michele Puryear                                                | Health Resources and Services Administration (HRSA) |                                 |                                                            |                                       |
| Sara Copeland                                                  | HRSA                                                |                                 |                                                            |                                       |
| Debi Sakar                                                     | HRSA                                                |                                 |                                                            |                                       |

|                  |                                                  |  |
|------------------|--------------------------------------------------|--|
| Alaina Harris    | HRSA                                             |  |
| Carla Cuthbert   | Centers for Disease Control and Prevention (CDC) |  |
| Joanne Mei       | CDC                                              |  |
| Marci Sontag     | Colorado School of Public Health                 |  |
| Alan Zukerman    | National Institutes of Health (NIH)              |  |
| Rebecca Goodwin  | NIH                                              |  |
| Swapna Abhyankar | NIH                                              |  |
| Reed Deshler     | AlignOrg Solutions                               |  |
| Mike Smith       | AlignOrg Solutions                               |  |
| Jelili Ojodu     | Association of Public Health Laboratories (APHL) |  |
| Elizabeth Jones  | APHL                                             |  |
| Asha Farrah      | APHL                                             |  |

**Participants in the July 2012 Subject Matter Experts Meeting**

Additional information includes state or organization represented by each participant, number of newborn screens performed in each represented state, number of annual births in each represented state, and number of core conditions screened in each representative state at the time of the meeting

| <b>Newborn Screening Subject Matter Experts Meeting on QIs<br/>July 30-31, 2012</b> |                                                          |                                 |                                                            |                                       |
|-------------------------------------------------------------------------------------|----------------------------------------------------------|---------------------------------|------------------------------------------------------------|---------------------------------------|
| <b>Attendee Name</b>                                                                | <b>State/Affiliation</b>                                 | <b>Annual Births (2011) [3]</b> | <b>Number of Core RUSP Conditions Screened in 2012 [2]</b> | <b>One Screen or Two Screen State</b> |
| Swapna Abhyankar                                                                    | National Library of Medicine (NLM)                       |                                 |                                                            |                                       |
| Cindy Ashley                                                                        | Alabama                                                  | 58,448                          | 28                                                         | Two                                   |
| Becky Bailey                                                                        | North Dakota                                             | 10,106                          | 28                                                         | One                                   |
| Lou Bartoshesky                                                                     | Delaware                                                 | 11,023                          | 29                                                         | Two                                   |
| Linda Beischel                                                                      | Montana                                                  | 12,118                          | 28                                                         | One                                   |
| Stan Berberich                                                                      | Iowa                                                     | 38,702                          | 28                                                         | One                                   |
| Natasha Bonhomme                                                                    | Genetic Alliance                                         |                                 |                                                            |                                       |
| Bob Bowman                                                                          | Indiana                                                  | 83,227                          | 29                                                         | One                                   |
| Amy Brower                                                                          | American College of Medical Genetics and Genomics (ACMG) |                                 |                                                            |                                       |
| Michele Caggana                                                                     | New York                                                 | 240,916                         | 29                                                         | One                                   |
| Colleen Clarke                                                                      | Loisusana                                                | 62,642                          | 28                                                         | One                                   |
| Anne Comeau                                                                         | Massachusetts                                            | 72,439                          | 28                                                         | One                                   |
| Sara Copeland                                                                       | HRSA                                                     |                                 |                                                            |                                       |
| William Cramer                                                                      | Pennsylvania                                             | 142,514                         | 28                                                         | One                                   |

|                        |                                              |               |           |            |
|------------------------|----------------------------------------------|---------------|-----------|------------|
| Hank Dorkin            | Children's Hospital / Harvard Medical School |               |           |            |
| Roger Eaton            | Massachusetts                                | 72,439        | 28        | One        |
| Lisa Feuchtbaum        | California                                   | 503,755       | 30        | One        |
| Bryant Fortner         | South Carolina                               | 57,155        | 28        | One        |
| Lucy Fossen            | South Dakota                                 | 12,104        | 28        | One        |
| Debra Freedenberg      | Texas                                        | 382,727       | 29        | Two        |
| Jane Getchell          | APHL                                         |               |           |            |
| Michael Glass          | Washington                                   | 87,463        | 28        | Two        |
| Aaron Goldenberg       | Case Western Reserve University              |               |           |            |
| Art Hagar              | Georgia                                      | 130,280       | 28        | One        |
| Alaina Harris          | HRSA                                         |               |           |            |
| Kathryn Hassel         | University of Colorado, Denver               |               |           |            |
| Cindy Hinton           | CDC                                          |               |           |            |
| Amy Hoffman            | ACMG                                         |               |           |            |
| Phillis Hoggatt        | Mississippi                                  | 38,669        | 29        | One        |
| Patrick Hopkins        | Missouri                                     | 75,446        | 28        | One        |
| Cindy Ingham           | Vermont                                      | 6,009         | 28        | One        |
| <b>Ward Jacox</b>      | <b>Arizona</b>                               | <b>86,441</b> | <b>28</b> | <b>Two</b> |
| Carol Johnson          | Iowa                                         | 38,702        | 28        | One        |
| Yvonne Kellar-Guenther | Colorado School of Public Health             |               |           |            |
| Jamey Kendall          | Kansas                                       | 40,341        | 28        | One        |
| Janice Kong            | Hawaii                                       | 18,980        | 28        | Two        |
| Michelle Lewis         | Johns Hopkins University                     |               |           |            |
| Sharon Linard          | Ohio                                         | 138,483       | 28        | One        |
| Jennifer Macdonald     | Virginia                                     | 103,013       | 28        | One        |
| Mark McCann            | Minnesota                                    | 68,772        | 28        | One        |
| Jelili Ojodu           | APHL                                         |               |           |            |
| Susan Oliver           | Connecticut                                  | 36,539        | 29        | One        |
| Richard Parad          | Brigham and Women's Hospital                 |               |           |            |
| Melissa Parisi         | NIH                                          |               |           |            |
| Julie Raburn-Miller    | Missouri                                     | 75,446        | 28        | One        |
| Deborah Rodriguez      | New York                                     | 240,916       | 29        | One        |
| Inderneel Sahai        | Massachusetts                                | 72,439        | 28        | One        |
| Scott Shone            | New Jersey                                   | 104,230       | 29        | One        |
| Marci Sontag           | Colorado School of Public Health             |               |           |            |
| Susan Tanksley         | Texas                                        | 382,727       | 29        | Two        |
| Laura Taylor           | Colorado                                     | 65,187        | 29        | Two        |
| Lois Taylor            | Florida                                      | 213,148       | 29        | One        |
| Patricia Terry         | Mississippi                                  | 38,669        | 29        | One        |
| Tiina Urv              | NIH                                          |               |           |            |
| Sheila Weiss           | Washington                                   | 87,463        | 28        | Two        |

|                    |                          |  |  |
|--------------------|--------------------------|--|--|
| Kupper Wintergerst | University of Louisville |  |  |
| Alan Zuckerman     | NLM                      |  |  |

**Participants in the January 2013 Subject Matter Experts Meeting**

Additional information includes state or organization represented by each participant, number of newborn screens performed in each represented state, number of annual births in each represented state, and number of core conditions screened in each representative state at the time of the meeting

| <b>Newborn Screening Subject Matter Experts Meeting (Webinar) on QIs</b> |                          |                                 |                                                            |                                       |
|--------------------------------------------------------------------------|--------------------------|---------------------------------|------------------------------------------------------------|---------------------------------------|
| <b>January 23, 2013</b>                                                  |                          |                                 |                                                            |                                       |
| <b>Attendee Name</b>                                                     | <b>State/Affiliation</b> | <b>Annual Births (2011) [4]</b> | <b>Number of Core RUSP Conditions Screened in 2012 [2]</b> | <b>One Screen or Two Screen State</b> |
| Stan Berberich                                                           | Iowa                     | 39,094                          | 29                                                         | One                                   |
| Michele Caggana                                                          | New York                 | 236,980                         | 29                                                         | One                                   |
| Debra Freedenberg                                                        | Texas                    | 387,340                         | 29                                                         | Two                                   |
| Ward Jacox                                                               | Arizona                  | 85,600                          | 28                                                         | Two                                   |
| Alex Kemper                                                              | Duke University          |                                 |                                                            |                                       |
| Jamey Kendall                                                            | Kansas                   | 38,839                          | 28                                                         | One                                   |
| Sharon Linard                                                            | Ohio                     | 138,936                         | 29                                                         | One                                   |
| Jennifer MacDonald                                                       | Virginia                 | 102,147                         | 28                                                         | One                                   |
| Inderneel Sahai                                                          | Massachusetts            | 71,788                          | 29                                                         | One                                   |
| Lois Taylor                                                              | Florida                  | 215,407                         | 29                                                         | One                                   |
| Tiina Urv                                                                | NIH                      |                                 |                                                            |                                       |

**Participants in the December 2015 and February 2016 Subject Matter Experts Meeting**

Additional information includes state or organization represented by each participant, number of newborn screens performed in each represented state, number of annual births in each represented state, and number of core conditions screened in each representative state at the time of the meeting

| <b>Newborn Screening Subject Matter Experts Meeting (Webinar) on QIs</b> |                          |                                 |                                                            |                                       |
|--------------------------------------------------------------------------|--------------------------|---------------------------------|------------------------------------------------------------|---------------------------------------|
| <b>December 5, 2015 and February 10, 2016</b>                            |                          |                                 |                                                            |                                       |
| <b>Attendee Name</b>                                                     | <b>State/Affiliation</b> | <b>Annual Births (2011) [5]</b> | <b>Number of Core RUSP Conditions Screened in 2012 [2]</b> | <b>One Screen or Two Screen State</b> |
| Willie Andrews                                                           | Virginia                 | 103,303                         | 31                                                         | One                                   |
| Mei Baker                                                                | Wisconsin                | 67,041                          | 31                                                         | One                                   |
| Stan Berberich                                                           | Iowa                     | 39,482                          | 31                                                         | One                                   |
| Lisa Canton                                                              | Oklahoma                 | 53,122                          | 31                                                         | One                                   |

|                      |                                  |         |    |     |
|----------------------|----------------------------------|---------|----|-----|
| Bob Currier          | California                       | 491,748 | 31 | One |
| Sam (Sandra) Dawe    | Wisconsin                        | 67,041  | 31 | One |
| Roger Eaton          | Massachusetts                    | 71,492  | 31 | One |
| Amy Gaviglio         | Minnesota                        | 69,834  | 31 | One |
| Fizza Gulamali-Majid | Maryland                         | 73,616  | 30 | Two |
| Kathy Hassell        | Colorado                         | 66,581  | 30 | Two |
| Vincent High         | 5AM Solutions                    |         |    |     |
| Patrick Hopkins      | Missouri                         | 75,061  | 31 | One |
| Mike Johnston        | PerkinElmer                      |         |    |     |
| Mike Lemke           | PerkinElmer                      |         |    |     |
| Sarah McKasson       | Colorado School of Public Health |         |    |     |
| Joshua Miller        | Colorado School of Public Health |         |    |     |
| Jelili Ojodu         | APHL                             |         |    |     |
| Kostas Petritis      | Arizona                          | 85,351  | 30 | Two |
| Ashleigh Ragsdale    | Washington                       | 88,990  | 31 | Two |
| Walter Reichert      | Natus                            |         |    |     |
| Brendan Reilly       | Texas                            | 403,618 | 31 | Two |
| Dari Shirazi         | Iowa                             | 39,482  | 31 | One |
| Scott Shone          | New Jersey                       | 103,127 | 31 | One |
| Sikha Singh          | APHL                             |         |    |     |
| Stuart Smiley        | 5AM Solutions                    |         |    |     |
| Marci Sontag         | Colorado School of Public Health |         |    |     |
| Tricy Thomas         | Natus                            |         |    |     |
| Jodi Vaughn          | PerkinElmer                      |         |    |     |
| Johnna Watson        | Maryland                         | 73,616  | 30 | Two |
| Alisha Wruck         | Minnesota                        | 69,834  | 31 | One |
| Careema Yusuf        | APHL                             |         |    |     |

**Revisions in 2014 and 2017 to National Newborn Screening Quality Indicator on Timeliness (Quality Indicator 5)**

|                                                                                                                                               |                                                                                                                                                                                                                                                                   |                                                                                                                                                   |
|-----------------------------------------------------------------------------------------------------------------------------------------------|-------------------------------------------------------------------------------------------------------------------------------------------------------------------------------------------------------------------------------------------------------------------|---------------------------------------------------------------------------------------------------------------------------------------------------|
| Initial Quality Indicator 5 following inclusion of feedback from public comment period (2013)                                                 | Revised Quality Indicator 5 to adhere with ACHDNC timeliness recommendations (2014)                                                                                                                                                                               | Revised Quality Indicator 5 to adhere to units of days versus hours modification requested by newborn screening programs (2017)                   |
| a) Birth to specimen collection, data collected in aggregate by state, with proportions of screens indicated in the following categories less | a) Time from birth to specimen collection/ point-of-care testing with the number of specimens/screens tallied in the following categories: <ul style="list-style-type: none"> <li>• Less than 12 hours from birth</li> <li>• 12 to 24 hours from birth</li> </ul> | <b>a) Time from birth to specimen collection/ point-of-care testing with the number of specimens/screens tallied in the following categories:</b> |

|                                                                                                                                                                                                                                                                                                                                                                                                                                                                                                                                                                                                                                                                                                                                                                                                                                                                                                                                                                         |                                                                                                                                                                                                                                                                                                                                                                                                                                                                                                                                                                                                                                                                                                                                                                                                                                                                                                                                                                                                                                                                                                                                                                                                                                                                                                                                                                                        |                                                                                                                                                                                                                                                                                                                                                                                                                                                                                                                                                                                                                                                                                                                                                                                                                                                                                                                                                                                                                                                                                                 |
|-------------------------------------------------------------------------------------------------------------------------------------------------------------------------------------------------------------------------------------------------------------------------------------------------------------------------------------------------------------------------------------------------------------------------------------------------------------------------------------------------------------------------------------------------------------------------------------------------------------------------------------------------------------------------------------------------------------------------------------------------------------------------------------------------------------------------------------------------------------------------------------------------------------------------------------------------------------------------|----------------------------------------------------------------------------------------------------------------------------------------------------------------------------------------------------------------------------------------------------------------------------------------------------------------------------------------------------------------------------------------------------------------------------------------------------------------------------------------------------------------------------------------------------------------------------------------------------------------------------------------------------------------------------------------------------------------------------------------------------------------------------------------------------------------------------------------------------------------------------------------------------------------------------------------------------------------------------------------------------------------------------------------------------------------------------------------------------------------------------------------------------------------------------------------------------------------------------------------------------------------------------------------------------------------------------------------------------------------------------------------|-------------------------------------------------------------------------------------------------------------------------------------------------------------------------------------------------------------------------------------------------------------------------------------------------------------------------------------------------------------------------------------------------------------------------------------------------------------------------------------------------------------------------------------------------------------------------------------------------------------------------------------------------------------------------------------------------------------------------------------------------------------------------------------------------------------------------------------------------------------------------------------------------------------------------------------------------------------------------------------------------------------------------------------------------------------------------------------------------|
| <p>than 12 hours, 12 to 24 hours, greater than 24 to 48 hours, greater than 48 to 72 hours, 4 days and greater</p> <p>I. Initial dried blood spot screen:</p> <p>II. Initial critical congenital heart disease screening</p> <p>III. Initial early hearing loss screening</p> <p>IV. For subsequent dried blood spot screen: less than 7 days, 7-10 days, greater than 10 to 14 days, greater than 14 days.</p> <p>b) Specimen collection to receipt by lab [reflected by time sample is logged in at lab], data collected in aggregate by state, with proportions of screens indicated in the following categories: Same day as collection, calendar day after collection, 2 calendar days after collection, 3 calendar days after collection, 4 calendar days after collection, 5 - 6 calendar days after collection, more than 7-10 calendar days after collection.</p> <p>I. Initial dried blood spot screen:</p> <p>II. For subsequent dried blood spot screen</p> | <ul style="list-style-type: none"> <li>• Greater than 24 to 48 hours from birth</li> <li>• Greater than 48 to 72 hours from birth</li> <li>• Greater than 72 hours from birth</li> <li>• Time elapsed unknown</li> </ul> <p>i. Number of first dried blood spot specimens collected in the specified time intervals from birth, divided by the total number of first dried blood spot specimens collected. Total number of first dried blood spot specimens collected is calculated through the summation of values entered for each time interval category.</p> <p>ii. Number of reported critical congenital heart disease (CCHD) screens completed in the specified time intervals from birth, divided by the total number of critical congenital heart disease (CCHD) screens. Total number of reported complete critical congenital heart disease (CCHD) screens is calculated through the summation of values entered for each time interval category.</p> <p>iii. Number of reported early hearing detection and intervention (EHDI) screens completed in the specified time intervals from birth, divided by the total number of early hearing detection and intervention (EHDI) screens. Total number of reported complete early hearing detection and intervention (EHDI) screens is calculated through the summation of values entered for each time interval category.</p> | <p>Less than 12 hours from birth</p> <p>12 to 24 hours from birth</p> <p>Greater than 24 to 48 hours from birth</p> <p>Greater than 48 to 72 hours from birth</p> <p>Greater than 72 hours from birth</p> <p>Time elapsed unknown</p> <p>Total number of first dried blood spot specimens collected is calculated through the summation of values entered for each time category.</p> <p>i. Number of first dried blood spot specimens collected in the specified time categories in units of hours from birth, divided by the total number of first dried blood spot specimens collected.</p> <p>ii. Number of reported critical congenital heart disease (CCHD) screens completed in the specified time categories in units of hours from birth, divided by the total number of critical congenital heart disease (CCHD) screens.</p> <p>iii. Number of reported early hearing detection and intervention (EHDI) screens completed in the specified time categories in units of hours from birth, divided by the total number of early hearing detection and intervention (EHDI) screens.</p> |
|-------------------------------------------------------------------------------------------------------------------------------------------------------------------------------------------------------------------------------------------------------------------------------------------------------------------------------------------------------------------------------------------------------------------------------------------------------------------------------------------------------------------------------------------------------------------------------------------------------------------------------------------------------------------------------------------------------------------------------------------------------------------------------------------------------------------------------------------------------------------------------------------------------------------------------------------------------------------------|----------------------------------------------------------------------------------------------------------------------------------------------------------------------------------------------------------------------------------------------------------------------------------------------------------------------------------------------------------------------------------------------------------------------------------------------------------------------------------------------------------------------------------------------------------------------------------------------------------------------------------------------------------------------------------------------------------------------------------------------------------------------------------------------------------------------------------------------------------------------------------------------------------------------------------------------------------------------------------------------------------------------------------------------------------------------------------------------------------------------------------------------------------------------------------------------------------------------------------------------------------------------------------------------------------------------------------------------------------------------------------------|-------------------------------------------------------------------------------------------------------------------------------------------------------------------------------------------------------------------------------------------------------------------------------------------------------------------------------------------------------------------------------------------------------------------------------------------------------------------------------------------------------------------------------------------------------------------------------------------------------------------------------------------------------------------------------------------------------------------------------------------------------------------------------------------------------------------------------------------------------------------------------------------------------------------------------------------------------------------------------------------------------------------------------------------------------------------------------------------------|

|                                                                                                                                                                                                                                                                                                                                                                                                                                                                                                                                                                                                                                   |                                                                                                                                                                                                                                                                                                                                                                                                                                                                                                                                                                                                                                                                                                                                                                                                                                                                                                                                                                                                                                                                                                                                                                                                                                                                                                                                                                                                                                                                                                                                                                  |                                                                                                                                                                                                                                                                                                                                                                                                                                                                                                                                                                                                                                                                                                                                                                                                                                                                                                                                                                                                                                                                                                                                                                                                                                                                                                                                                                                                                                                                |
|-----------------------------------------------------------------------------------------------------------------------------------------------------------------------------------------------------------------------------------------------------------------------------------------------------------------------------------------------------------------------------------------------------------------------------------------------------------------------------------------------------------------------------------------------------------------------------------------------------------------------------------|------------------------------------------------------------------------------------------------------------------------------------------------------------------------------------------------------------------------------------------------------------------------------------------------------------------------------------------------------------------------------------------------------------------------------------------------------------------------------------------------------------------------------------------------------------------------------------------------------------------------------------------------------------------------------------------------------------------------------------------------------------------------------------------------------------------------------------------------------------------------------------------------------------------------------------------------------------------------------------------------------------------------------------------------------------------------------------------------------------------------------------------------------------------------------------------------------------------------------------------------------------------------------------------------------------------------------------------------------------------------------------------------------------------------------------------------------------------------------------------------------------------------------------------------------------------|----------------------------------------------------------------------------------------------------------------------------------------------------------------------------------------------------------------------------------------------------------------------------------------------------------------------------------------------------------------------------------------------------------------------------------------------------------------------------------------------------------------------------------------------------------------------------------------------------------------------------------------------------------------------------------------------------------------------------------------------------------------------------------------------------------------------------------------------------------------------------------------------------------------------------------------------------------------------------------------------------------------------------------------------------------------------------------------------------------------------------------------------------------------------------------------------------------------------------------------------------------------------------------------------------------------------------------------------------------------------------------------------------------------------------------------------------------------|
| <p>c) Specimen receipt to reporting out complete results, data collected in aggregate by state, with proportions of screens indicated in the following categories:<br/>less than 12 hours, 12 to 24 hours, greater than 24 to 48 hours, greater than 48 to 72 hours, 4 days and greater.</p> <p>d) Release of out-of-range results to notification of medical provider [reported by disorder], data collected in aggregate by state, with proportions of screens indicated in the following categories:<br/>less than 12 hours, 12 to 24 hours, greater than 24 to 48 hours, greater than 48 to 72 hours, 4 days and greater.</p> | <p>iv. In two screen states, number of first dried blood spot specimens collected for the second screen in the following time intervals from birth, divided by the total number of first dried blood spot specimens collected for the second screen. Total number of first dried blood spot specimens collected for the second screen is calculated through the summation of values entered for each time interval category.</p> <ul style="list-style-type: none"> <li>• Less than 7 days from birth</li> <li>• 7 to10 days from birth</li> <li>• 11 to 14 days from birth</li> <li>• 15 days or more from birth</li> <li>• Time elapsed unknown</li> </ul> <p>v. Number of subsequent dried blood spot specimens collected in the specified time intervals from birth, divided by the total number of subsequent dried blood spot specimens collected. Total number of subsequent dried blood spot specimens collected is calculated through the summation of values entered for each time interval category.</p> <ul style="list-style-type: none"> <li>• Less than 7 days from birth</li> <li>• 7 to10 days from birth</li> <li>• 11 to 14 days from birth</li> <li>• 15 days or more from birth</li> <li>• Time elapsed unknown</li> </ul> <p><b>b) Time from specimen collection to receipt by lab with the number of specimens tallied in the following categories:</b></p> <ul style="list-style-type: none"> <li>▪ Less than or equal to 24 hours after specimen collection</li> <li>▪ Greater than 24 to 48 hours after specimen collection</li> </ul> | <p>iv. In two screen states, number of first dried blood spot specimens collected for the second screen in the following time categories in units of days from birth, divided by the total number of first dried blood spot specimens collected for the second screen.</p> <p style="padding-left: 40px;">Less than 7 days from birth<br/>7 to10 days from birth<br/>11 to 14 days from birth<br/>15 days or more from birth<br/>Time elapsed unknown</p> <p>v. Number of subsequent dried blood spot specimens collected in the specified time categories in units of days from birth, divided by the total number of subsequent dried blood spot specimens collected.</p> <p style="padding-left: 40px;">Less than 7 days from birth<br/>7 to10 days from birth<br/>11 to 14 days from birth<br/>15 days or more from birth<br/>Time elapsed unknown</p> <p><b>b) Time from specimen collection to receipt by lab with the number of specimens tallied in the following categories:</b></p> <ul style="list-style-type: none"> <li>• Same day as collection (Day 0)</li> <li>• Day after collection (Day 1)</li> <li>• Day 2 after collection (Day 2)</li> <li>• Day 3 after collection (Day 3)</li> <li>• Day 4 after collection (Day 4)</li> <li>• Day 5 after collection (Day 5)</li> <li>• Day 6 after collection (Day 6)</li> <li>• Greater than or equal to Day 7 after collection (<math>\geq</math>Day 7)</li> <li>• Time elapsed unknown</li> </ul> |
|-----------------------------------------------------------------------------------------------------------------------------------------------------------------------------------------------------------------------------------------------------------------------------------------------------------------------------------------------------------------------------------------------------------------------------------------------------------------------------------------------------------------------------------------------------------------------------------------------------------------------------------|------------------------------------------------------------------------------------------------------------------------------------------------------------------------------------------------------------------------------------------------------------------------------------------------------------------------------------------------------------------------------------------------------------------------------------------------------------------------------------------------------------------------------------------------------------------------------------------------------------------------------------------------------------------------------------------------------------------------------------------------------------------------------------------------------------------------------------------------------------------------------------------------------------------------------------------------------------------------------------------------------------------------------------------------------------------------------------------------------------------------------------------------------------------------------------------------------------------------------------------------------------------------------------------------------------------------------------------------------------------------------------------------------------------------------------------------------------------------------------------------------------------------------------------------------------------|----------------------------------------------------------------------------------------------------------------------------------------------------------------------------------------------------------------------------------------------------------------------------------------------------------------------------------------------------------------------------------------------------------------------------------------------------------------------------------------------------------------------------------------------------------------------------------------------------------------------------------------------------------------------------------------------------------------------------------------------------------------------------------------------------------------------------------------------------------------------------------------------------------------------------------------------------------------------------------------------------------------------------------------------------------------------------------------------------------------------------------------------------------------------------------------------------------------------------------------------------------------------------------------------------------------------------------------------------------------------------------------------------------------------------------------------------------------|

|  |                                                                                                                                                                                                                                                                                                                                                                                                                                                                                                                                                                                                                                                                                                                                                                                                                                                                                                                                                                                                                                                                                                                                                                                                                                                                                                                                                                                           |                                                                                                                                                                                                                                                                                                                                                                                                                                                                                                                                                                                                                                                                                                                                                                                                                                                                                                                                                                                                                                                                                                                                                                                                                                                                                   |
|--|-------------------------------------------------------------------------------------------------------------------------------------------------------------------------------------------------------------------------------------------------------------------------------------------------------------------------------------------------------------------------------------------------------------------------------------------------------------------------------------------------------------------------------------------------------------------------------------------------------------------------------------------------------------------------------------------------------------------------------------------------------------------------------------------------------------------------------------------------------------------------------------------------------------------------------------------------------------------------------------------------------------------------------------------------------------------------------------------------------------------------------------------------------------------------------------------------------------------------------------------------------------------------------------------------------------------------------------------------------------------------------------------|-----------------------------------------------------------------------------------------------------------------------------------------------------------------------------------------------------------------------------------------------------------------------------------------------------------------------------------------------------------------------------------------------------------------------------------------------------------------------------------------------------------------------------------------------------------------------------------------------------------------------------------------------------------------------------------------------------------------------------------------------------------------------------------------------------------------------------------------------------------------------------------------------------------------------------------------------------------------------------------------------------------------------------------------------------------------------------------------------------------------------------------------------------------------------------------------------------------------------------------------------------------------------------------|
|  | <ul style="list-style-type: none"> <li>▪ Greater than 48 to 72 hours after specimen collection</li> <li>▪ Greater than 72 to 96 hours (4 days) after specimen collection</li> <li>▪ Greater than 96 (4 days) to 120 hours (5 days) after specimen collection</li> <li>▪ Greater than 120 (5 days) to 144 hours (6 days) after specimen collection</li> <li>▪ Greater than 144 hours (6 days) after specimen collection</li> <li>▪ Time elapsed unknown</li> </ul> <p>i. Number of first dried blood spot specimens received at your state’s newborn screening laboratory in the specified time intervals <u>from specimen collection</u>, divided by the total number of first dried blood spot specimens received at your state’s newborn screening laboratory. Total number of first dried blood spot specimens received is calculated through the summation of values entered for each time interval category.</p> <p>ii. Number of subsequent dried blood spot specimens received at your state’s newborn screening laboratory in the specified time intervals <u>from specimen collection</u>, divided by the total number of subsequent dried blood spot specimens received at your state’s newborn screening laboratory. Total number of subsequent dried blood spot specimens received is calculated through the summation of values entered for each time interval category.</p> | <p>Total number of first dried blood spot specimens received is calculated through the summation of values entered for each time category.</p> <p>i. Number of first dried blood spot specimens received at your state’s newborn screening laboratory in the specified time categories in units of days from specimen collection, divided by the total number of first dried blood spot specimens received at your state’s newborn screening laboratory.</p> <p>ii. Number of subsequent dried blood spot specimens received at your state’s newborn screening laboratory in the specified time categories in units of days from specimen collection, divided by the total number of subsequent dried blood spot specimens received at your state’s newborn screening laboratory.</p> <p><b>c) Time from specimen receipt at your state’s newborn screening laboratory to reporting out specimen results, with the number of specimens tallied in the following categories (includes all first and subsequent specimens):</b></p> <p>Same day as receipt at lab (Day 0)<br/> Day after receipt at lab (Day 1)<br/> Day 2 after receipt at lab (Day 2)<br/> Day 3 after receipt at lab (Day 3)<br/> Day 4 after receipt at lab (Day 4)<br/> Day 5 after receipt at lab (Day 5)</p> |
|--|-------------------------------------------------------------------------------------------------------------------------------------------------------------------------------------------------------------------------------------------------------------------------------------------------------------------------------------------------------------------------------------------------------------------------------------------------------------------------------------------------------------------------------------------------------------------------------------------------------------------------------------------------------------------------------------------------------------------------------------------------------------------------------------------------------------------------------------------------------------------------------------------------------------------------------------------------------------------------------------------------------------------------------------------------------------------------------------------------------------------------------------------------------------------------------------------------------------------------------------------------------------------------------------------------------------------------------------------------------------------------------------------|-----------------------------------------------------------------------------------------------------------------------------------------------------------------------------------------------------------------------------------------------------------------------------------------------------------------------------------------------------------------------------------------------------------------------------------------------------------------------------------------------------------------------------------------------------------------------------------------------------------------------------------------------------------------------------------------------------------------------------------------------------------------------------------------------------------------------------------------------------------------------------------------------------------------------------------------------------------------------------------------------------------------------------------------------------------------------------------------------------------------------------------------------------------------------------------------------------------------------------------------------------------------------------------|



|  |                                                                                                                                                                                                                                                                                                                                                                                                                                                                                                                                                                                                                                                                                                                                                                                                                                                                                                                                                                                                                                                                                                                                                                                                                                                                                                                   |                                                                                                                                                                                                                                                                                                                                                                                                                                                                                                                                                                                                                                                                                                                                                                                                                                                                                                                                                                                                                                                                                                                                                                                                                                                                                                                           |
|--|-------------------------------------------------------------------------------------------------------------------------------------------------------------------------------------------------------------------------------------------------------------------------------------------------------------------------------------------------------------------------------------------------------------------------------------------------------------------------------------------------------------------------------------------------------------------------------------------------------------------------------------------------------------------------------------------------------------------------------------------------------------------------------------------------------------------------------------------------------------------------------------------------------------------------------------------------------------------------------------------------------------------------------------------------------------------------------------------------------------------------------------------------------------------------------------------------------------------------------------------------------------------------------------------------------------------|---------------------------------------------------------------------------------------------------------------------------------------------------------------------------------------------------------------------------------------------------------------------------------------------------------------------------------------------------------------------------------------------------------------------------------------------------------------------------------------------------------------------------------------------------------------------------------------------------------------------------------------------------------------------------------------------------------------------------------------------------------------------------------------------------------------------------------------------------------------------------------------------------------------------------------------------------------------------------------------------------------------------------------------------------------------------------------------------------------------------------------------------------------------------------------------------------------------------------------------------------------------------------------------------------------------------------|
|  | <p><b>C) Time from specimen receipt at your state’s newborn screening laboratory to reporting out specimen results, with the number of specimens tallied in the following categories (includes all first and subsequent specimens):</b></p> <ul style="list-style-type: none"> <li>▪ Less than 12 hours after receipt</li> <li>▪ 12 to 24 hours after receipt</li> <li>▪ Greater than 24 to 48 hours after receipt</li> <li>▪ Greater than 48 to 72 hours after receipt</li> <li>▪ Greater than 72 to 96 hours (4 days) after receipt</li> <li>▪ Greater than 96 (4 days) to 120 hours (5 days) after receipt</li> <li>▪ Greater than 120 (5 days) to 144 hours (6 days) after receipt</li> <li>▪ Greater than 144 hours (6 days) after receipt</li> <li>▪ Time elapsed unknown</li> </ul> <p>i) For time-critical disorders<br/> ii) For non-time-critical disorders<br/> iii) Normal and out-of-range results for all disorders <b>from first dried blood spot specimens</b><br/> iv) Normal and out-of-range results for all disorders <b>from subsequent dried blood spot specimens</b><br/> v) In two screen states, normal and out-of-range results for all disorders <b>from second screen dried blood spot specimens</b></p> <p><b>d) Time from birth to reporting out specimen results, with the</b></p> | <p>Day 6 after receipt at lab (Day 6)<br/> Greater than or equal to Day 7 after receipt at lab (<math>\geq</math>Day 7)<br/> Time elapsed unknown</p> <p>Total number of first dried blood spot specimens received is calculated through the summation of values entered for each time category.</p> <p>i) For time-critical disorders<br/> ii) For non-time-critical disorders<br/> iii) For normal and out-of-range results for all disorders from first dried blood spot specimens<br/> iv) For normal and out-of-range results for all disorders from subsequent dried blood spot specimens<br/> v) In two screen states, normal and out-of-range results for all disorders from second screen dried blood spot specimens</p> <p><b>d) Time from birth to reporting out specimen results, with the number of specimens tallied in the following categories (includes all first and subsequent specimens):</b><br/> Less than or equal to Day 2 after birth (<math>\leq</math>Day 2)<br/> Day 3 after birth (Day 3)<br/> Day 4 after birth (Day 4)<br/> Day 5 after birth (Day 5)<br/> Day 6 after birth (Day 6)<br/> Day 7 after birth (Day 7)<br/> Day 8 after birth (Day 8)<br/> Day 9 after birth (Day 9)<br/> Greater than or equal to Day 10 after birth (<math>\geq</math>Day 10)<br/> Time elapsed unknown</p> |
|--|-------------------------------------------------------------------------------------------------------------------------------------------------------------------------------------------------------------------------------------------------------------------------------------------------------------------------------------------------------------------------------------------------------------------------------------------------------------------------------------------------------------------------------------------------------------------------------------------------------------------------------------------------------------------------------------------------------------------------------------------------------------------------------------------------------------------------------------------------------------------------------------------------------------------------------------------------------------------------------------------------------------------------------------------------------------------------------------------------------------------------------------------------------------------------------------------------------------------------------------------------------------------------------------------------------------------|---------------------------------------------------------------------------------------------------------------------------------------------------------------------------------------------------------------------------------------------------------------------------------------------------------------------------------------------------------------------------------------------------------------------------------------------------------------------------------------------------------------------------------------------------------------------------------------------------------------------------------------------------------------------------------------------------------------------------------------------------------------------------------------------------------------------------------------------------------------------------------------------------------------------------------------------------------------------------------------------------------------------------------------------------------------------------------------------------------------------------------------------------------------------------------------------------------------------------------------------------------------------------------------------------------------------------|

|  |                                                                                                                                                                                                                                                                                                                                                                                                                                                                                                                                                                                                                                                                                                                                                                                                                                                                                                                                                                                                                                                                                                                                                                                                                                                                                                                                                                                                                                    |                                                                                                                                                                                                                                                                                                                                                                                                                                                                                                                                                                                                                                                                                                                                                           |
|--|------------------------------------------------------------------------------------------------------------------------------------------------------------------------------------------------------------------------------------------------------------------------------------------------------------------------------------------------------------------------------------------------------------------------------------------------------------------------------------------------------------------------------------------------------------------------------------------------------------------------------------------------------------------------------------------------------------------------------------------------------------------------------------------------------------------------------------------------------------------------------------------------------------------------------------------------------------------------------------------------------------------------------------------------------------------------------------------------------------------------------------------------------------------------------------------------------------------------------------------------------------------------------------------------------------------------------------------------------------------------------------------------------------------------------------|-----------------------------------------------------------------------------------------------------------------------------------------------------------------------------------------------------------------------------------------------------------------------------------------------------------------------------------------------------------------------------------------------------------------------------------------------------------------------------------------------------------------------------------------------------------------------------------------------------------------------------------------------------------------------------------------------------------------------------------------------------------|
|  | <p><b>number of specimens tallied in the following categories (includes all first and subsequent specimens):</b></p> <ul style="list-style-type: none"> <li>a. Less than or equal to 48 hours after birth</li> <li>b. Greater than 48 to 72 hours after birth</li> <li>c. Greater than 72 to 96 hours (4 days) after birth</li> <li>d. Greater than 96 hours (4 days) to 120 hours (5 days) after birth</li> <li>e. Greater than 120 hours (5 days) to 144 hours (6 days) after birth</li> <li>f. Greater than 144 (6 days) to 168 hours (7 days) after birth</li> <li>g. Greater than 168 hours (7 days) to 192 hours (8 days) after birth</li> <li>h. Greater than 192 hours (8 days) to 216 hours (9 days) after birth</li> <li>i. Greater than 216 hours (9 days) to 240 hours (10 days) after birth</li> <li>j. Greater than 240 hours (10 days) after birth</li> <li>k. Time elapsed unknown</li> </ul> <ul style="list-style-type: none"> <li>i) For time-critical disorders</li> <li>ii) For non-time-critical disorders</li> <li>iii) <u>Normal and out-of-range results for all disorders <b>from first dried blood spot specimens</b></u></li> <li>iv) <u>Normal and out-of-range results for all disorders <b>from subsequent dried blood spot specimens</b></u></li> </ul> <p><u>In two screen states, normal and out-of-range results for all disorders <b>from second screen dried blood spot specimens</b></u></p> | <p>Total number of dried blood spot specimens with out-of-range results requiring clinical diagnostic workup by an appropriate medical professional for time critical disorders is calculated through the summation of values entered for each time category.</p> <ul style="list-style-type: none"> <li>i) For time-critical disorders</li> <li>ii) For non-time-critical disorders</li> <li>iii) For normal and out-of-range results for all disorders from first dried blood spot specimens</li> <li>iv) For normal and out-of-range results for all disorders from subsequent dried blood spot specimens</li> <li>v) In two screen states, normal and out-of-range results for all disorders from second screen dried blood spot specimens</li> </ul> |
|--|------------------------------------------------------------------------------------------------------------------------------------------------------------------------------------------------------------------------------------------------------------------------------------------------------------------------------------------------------------------------------------------------------------------------------------------------------------------------------------------------------------------------------------------------------------------------------------------------------------------------------------------------------------------------------------------------------------------------------------------------------------------------------------------------------------------------------------------------------------------------------------------------------------------------------------------------------------------------------------------------------------------------------------------------------------------------------------------------------------------------------------------------------------------------------------------------------------------------------------------------------------------------------------------------------------------------------------------------------------------------------------------------------------------------------------|-----------------------------------------------------------------------------------------------------------------------------------------------------------------------------------------------------------------------------------------------------------------------------------------------------------------------------------------------------------------------------------------------------------------------------------------------------------------------------------------------------------------------------------------------------------------------------------------------------------------------------------------------------------------------------------------------------------------------------------------------------------|

## REFERENCES

- 1- Centers for Disease Control and Prevention. National Center for Health Statistics (NCHS). Retrieved June 25, 2019 from <https://www.cdc.gov/nchs/>
- 2- Health Resources and Services Administration. Recommended Uniform Screening Panel (RUSP). Retrieved June 25, 2019 from <https://www.hrsa.gov/advisory-committees/heritable-disorders/rusp/index.html>
- 3- Martin JA, Hamilton BE, Osterman MJK, et al. Births: Final data for 2012. National vital statistics reports; vol 62 no 9. Hyattsville, MD: National Center for Health Statistics. 2013. Retrieved June 25, 2019 from [https://www.cdc.gov/nchs/data/nvsr/nvsr62/nvsr62\\_09.pdf](https://www.cdc.gov/nchs/data/nvsr/nvsr62/nvsr62_09.pdf)
- 4- Martin JA, Hamilton BE, Osterman MJK, et al. Births: Final data for 2013. National vital statistics reports; vol 64 no 1. Hyattsville, MD: National Center for Health Statistics. 2015. Retrieved June 25, 2019 from [https://www.cdc.gov/nchs/data/nvsr/nvsr64/nvsr64\\_01.pdf](https://www.cdc.gov/nchs/data/nvsr/nvsr64/nvsr64_01.pdf)
- 5- Martin JA, Hamilton BE, Osterman MJK, et al. Births: Final data for 2015. National vital statistics report; vol 66, no 1. Hyattsville, MD: National Center for Health Statistics. 2017. Retrieved June 25, 2019 from [https://www.cdc.gov/nchs/data/nvsr/nvsr66/nvsr66\\_01.pdf](https://www.cdc.gov/nchs/data/nvsr/nvsr66/nvsr66_01.pdf)
